# Supplementary material for: Local Wisdom and Diversity of Medicinal Plants in Cha Miang Forest in Mae Kampong Village, Chiang Mai, Thailand, and Their Potential for Use as Osteoprotective Products
Source: MDPI journal article supplement (doi:10.3390/plants11111492), 2022-06-01
Supplement: s1 [file s1]

## Article

# Local Wisdom and Diversity of Medicinal Plants in Cha Miang Forest in Mae Kampong Village, Chiang Mai, Thailand, and Their Potential for Use as Osteoprotective Products

Treethip Sukkho <sup>1,2</sup>, Chartchai Khanongnuch <sup>3,4</sup>, Saisamorn Lumyong <sup>5,6</sup>, Jetsada Ruangsuriya <sup>7</sup>, Thanawat Pattananandecha <sup>2,8</sup>, Sutasinee Apichai <sup>2,8</sup>, Fumihiko Ogata <sup>9</sup>, Naohito Kawasaki <sup>9,10</sup> and Chalermpong Saenjum <sup>2,8,\*</sup>

<sup>1</sup> Department of Biotechnology, Graduate School, Chiang Mai University, Chiang Mai 50200, Thailand; treethip.sk@gmail.com

<sup>2</sup> Center of Excellence for Innovation in Analytical Science and Technology for Biodiversity-Based Economic and Society (I-ANALY-S-T\_B.BES-CMU), Chiang Mai University, Chiang Mai 50200, Thailand; thanawat.pdech@gmail.com (T.P.); sutasinee.apichai@gmail.com (S.A.)

<sup>3</sup> Division of Biotechnology, School of Agro-Industry, Faculty of Agro-Industry, Chiang Mai University, Chiang Mai 50200, Thailand; ck\_biot@yahoo.com

<sup>4</sup> Research Center for Multidisciplinary Approaches to Miang, Science and Technology Research Institute (STRI), Chiang Mai University, Chiang Mai 50200, Thailand

<sup>5</sup> Department of Biology, Faculty of Sciences, Chiang Mai University, Chiang Mai 50200, Thailand; scboi009@gmail.com

<sup>6</sup> Research Center of Microbial Diversity and Sustainable Utilization, Faculty of Science, Chiang Mai University, Chiang Mai 50200, Thailand

<sup>7</sup> Department of Biochemistry, Faculty of Medicine, Chiang Mai University, Chiang Mai 50200, Thailand; jetsada.ruang@cmu.ac.th

<sup>8</sup> Department of Pharmaceutical Sciences, Faculty of Pharmacy, Chiang Mai University, Chiang Mai 50200, Thailand

<sup>9</sup> Faculty of Pharmacy, Kindai University, 3-4-1 Kowakae, Higashi-Osaka, Osaka 577-8502, Japan

<sup>10</sup> Antiaging Center, Kindai University, 3-4-1 Kowakae, Higashi-Osaka, Osaka 577-8502, Japan; ogata@phar.kindai.ac.jp (F.O.); kawasaki@phar.kindai.ac.jp (N.K.)

\* Correspondence: chalermpong.saenjum@gmail.com or chalermpong.s@cmu.ac.th; Tel.: +668-9950-4227

## Supplementary Materials

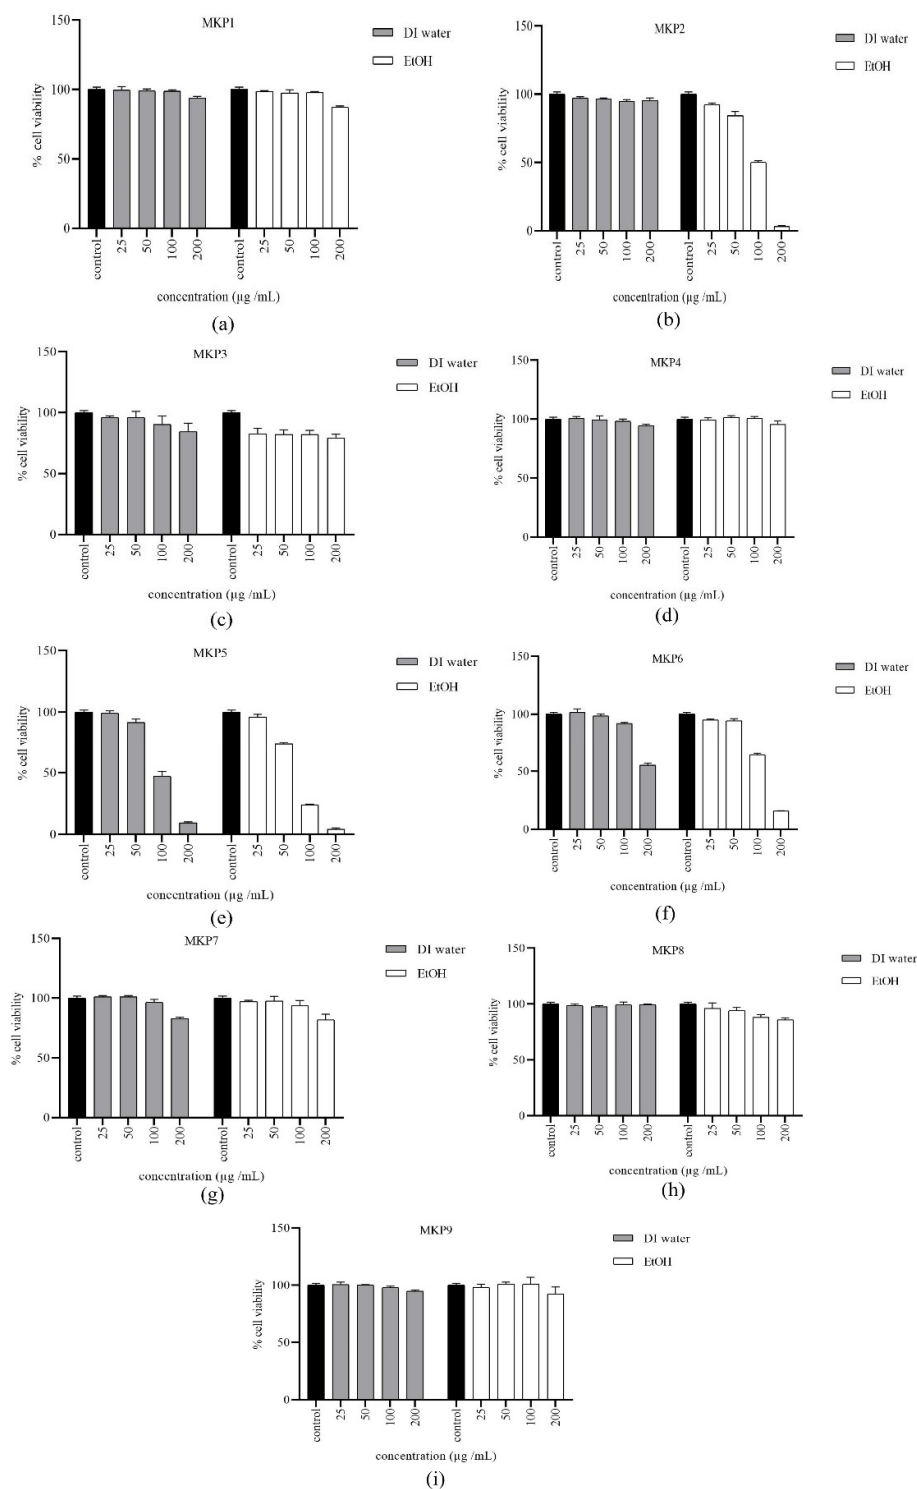

**Figure S1.** Cell Viability of MG-63 cells by PrestoBlue assay. (a) *S. javanica* subsp. *javanica* (MKP1), (b) *Z. montanum* (MKP2), (c) *C. sublyratus* (MKP3), (d) *P. curviflorus* (MKP4), (e) *C. iners* . (MKP5), (f) *D. cirrhosa* var. *cirrhosa* (MKP6), (g) *V. sambucinum* (MKP7), (h) *S. simpsonii* (MKP8) and (i) *T. asiatica* (MKP9).
